# Supplementary material
Source: Springer Nature journal article supplement (https://www.springermedizin.de/resource/supplementary/12913_2013_2971_MOESM6_ESM.pdf/9532496)
Supplement: MOESM6 [file 9532496]

• Education level: Junior high school

• Female

• Safety of the LTC facility

• Self- perceived financial status was poor

• Lived in LTC facility: 1-2 years

• Separated/ Divorced

• Not paid by children

• Widowed

Self- perceived financial status was very poor

• Introduction form governmental units

• Needs in one's own work

• Relative

Paid by Relative •

Other reason for contact with the LTC facility •
